# Supplementary material for: Association of Early Life Exposure to Phthalates With Obesity and Cardiometabolic Traits in Childhood: Sex Specific Associations
Source: Front Public Health. 2018 Nov 27;6:327. doi: 10.3389/fpubh.2018.00327 (PMC6277685; doi:10.3389/fpubh.2018.00327)
Supplement: Supplementary file 1 [file Data_Sheet_1.docx]

Supplemental Material

**Title:** Association of Early Life Exposure to Phthalates with Obesity and Cardiometabolic Traits in Childhood

**Authors:** Marina Vafeiadi,1 Antonis Myridakis,2 Theano Roumeliotaki,1 Katerina Margetaki1, Georgia Chalkiadaki,1 Eirini Dermitzaki,3 Maria Venihaki,3 Katerina Sarri,1 Maria Vassilaki,1,4 Vasiliki Leventakou1, Euripides G. Stephanou,2  Manolis Kogevinas,5,6 Leda Chatzi1,7,8

1Department of Social Medicine, Faculty of Medicine, University of Crete, Heraklion, Greece, 2Environmental Chemical Processes Laboratory (ECPL), Department of Chemistry, University of Crete, Heraklion, Greece, 3Department of Clinical Chemistry, School of Medicine, University of Crete, Heraklion, Crete, Greece, 4Department of Health Sciences Research, Mayo Clinic, Rochester, MN, USA, 5Barcelona Institute for Global Health (ISGlobal), Barcelona, Spain , 6Hospital del Mar Research Institute (IMIM), Barcelona, Spain, 7Department of Preventive Medicine, Keck School of Medicine, University of Southern California, Los Angeles, USA, 8Department of Genetics & Cell Biology, Faculty of Health, Medicine and Life Sciences, Maastricht University, Maastricht, Netherlands

Figure S 1. GAMS; Sex-stratified adjusted associations (95% CIs) of ΣDEHP phthalate metabolites (log10 Transformed, in μg /g Creatinine) at 4 years with systolic and diastolic BP z-scores at 4 years of age. Adjusted child sex, exact age at examination, and maternal characteristics (age at delivery, parity, education, pre-pregnancy BMI, and smoking in pregnancy). ++, observations.


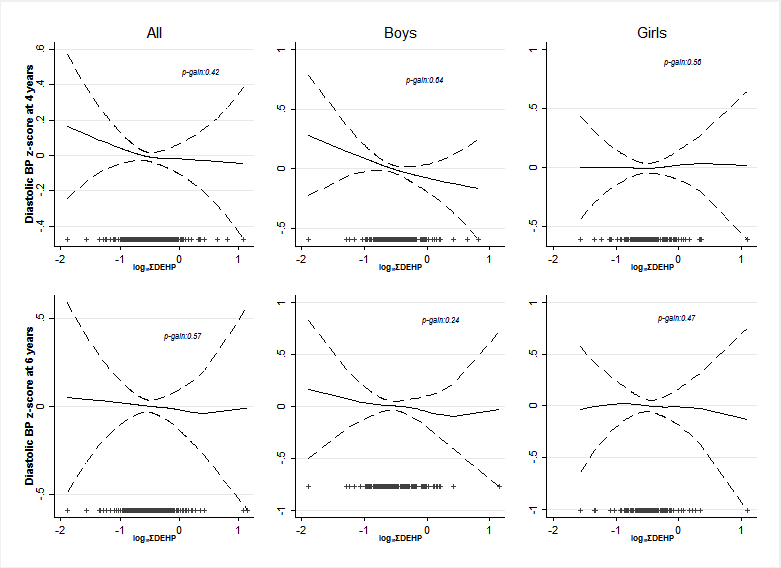


Table S 1. Sex-stratified associations between prenatal urinary individual and summed ΣDEHP phthalate metabolites (log10 Transformed, in μg /g Creatinine) with BMI z-score and adiposity indicators in children aged 4-6 years.

|  |  | All |  | Boys |  | Girls |  |
| --- | --- | --- | --- | --- | --- | --- | --- |
|  | n | β (95% CI) | n | β (95% CI) | n | β (95% CI) | p-sex interaction |
| BMI z-score |  |  |  |  |  |  |  |
| MEP | 220 | -0.09 (-0.28, 0.11) | 123 | -0.1 (-0.32, 0.12) | 97 | -0.09 (-0.45, 0.26) | 0.755 |
| MnBP | 209 | -0.18 (-0.41, 0.05) | 120 | -0.05 (-0.35, 0.24) | 89 | -0.27 (-0.65, 0.12) | 0.312 |
| MiBP | 214 | -0.3 (-0.6, 0.01) | 122 | -0.31 (-0.69, 0.06) | 92 | -0.25 (-0.77, 0.27) | 0.937 |
| MBzP | 186 | -0.13 (-0.44, 0.19) | 104 | -0.24 (-0.58, 0.1) | 82 | 0.06 (-0.54, 0.66) | 0.425 |
| ΣDEHP | 203 | -0.21 (-0.45, 0.03) | 117 | -0.21 (-0.46, 0.03) | 86 | -0.15 (-0.68, 0.38) | 0.893 |
| Waist circumference |  |  |  |  |  |  |  |
| MEP | 219 | -0.29 (-1.47, 0.88) | 122 | -0.15 (-1.54, 1.23) | 97 | -0.51 (-2.57, 1.55) | 0.816 |
| MnBP | 208 | -0.61 (-2.04, 0.82) | 119 | 0.58 (-1.3, 2.46) | 89 | -1.68 (-3.93, 0.57) | 0.123 |
| MiBP | 213 | -0.65 (-2.53, 1.23) | 121 | -1.03 (-3.42, 1.36) | 92 | -0.37 (-3.44, 2.69) | 0.72 |
| MBzP | 185 | -0.79 (-2.73, 1.16) | 103 | -1.21 (-3.44, 1.02) | 82 | -0.14 (-3.64, 3.36) | 0.57 |
| ΣDEHP | 202 | -0.61 (-2.05, 0.83) | 116 | -0.68 (-2.25, 0.88) | 86 | -0.15 (-3.1, 2.81) | 0.742 |
| Sum of skinfolds |  |  |  |  |  |  |  |
| MEP | 212 | 0.19 (-2.82, 3.21) | 118 | -0.04 (-3.67, 3.59) | 94 | 0.19 (-5.07, 5.45) | 0.825 |
| MnBP | 202 | -0.58 (-4.28, 3.13) | 115 | 4.54 (-0.22, 9.31) | 87 | -4.45 (-10.12, 1.22) | 0.015 |
| MiBP | 207 | -1.56 (-6.42, 3.31) | 117 | 0.81 (-5.44, 7.07) | 90 | -4.55 (-12.28, 3.18) | 0.328 |
| MBzP | 179 | 0.22 (-4.73, 5.18) | 99 | 0.31 (-5.66, 6.27) | 80 | -0.58 (-8.83, 7.66) | 0.908 |
| ΣDEHP | 196 | -0.53 (-4.21, 3.14) | 112 | 0.15 (-3.88, 4.19) | 84 | -1.83 (-9.26, 5.59) | 0.618 |
| Waist-to-height ratio |  |  |  |  |  |  |  |
| MEP | 219 | -0.01 (-0.05, 0.03) | 122 | -0.02 (-0.08, 0.05) | 97 | 0 (-0.02, 0.01) | 0.754 |
| MnBP | 208 | **0.1 (0.05, 0.14)** | **119** | **0.19 (0.11, 0.27)** | **89** | -0.01 (-0.03, 0.01) | **<0.001** |
| MiBP | 213 | 0.03 (-0.03, 0.09) | 121 | 0.08 (-0.03, 0.19) | 92 | -0.01 (-0.04, 0.01) | 0.138 |
| MBzP | 185 | 0.04 (-0.03, 0.11) | 103 | 0.06 (-0.05, 0.18) | 82 | 0.01 (-0.02, 0.03) | 0.7 |
| ΣDEHP | 202 | 0.01 (-0.04, 0.06) | 116 | 0.02 (-0.06, 0.09) | 86 | 0 (-0.03, 0.02) | 0.916 |

ΣDEHP: molar sum of MEHP, MEHHP, MEOHP. All models are adjusted for child sex, exact age at examination, and maternal characteristics (age at delivery, parity, education, pre-pregnancy BMI, and smoking in pregnancy). Statistically significant associations (P <0.05) are displayed in bold type.

Table S 2. Sex-stratified associations between child urinary individual and summed ΣDEHP phthalate metabolites (log10 Transformed, in μg /g Creatinine) with BMI z-score and adiposity indicators in children aged 4-6 years.

|  |  | All |  | Boys |  | Girls |  |
| --- | --- | --- | --- | --- | --- | --- | --- |
|  | n | β (95% CI) | n | β (95% CI) | n | β (95% CI) | p-sex interaction |
| BMI z-score |  |  |  |  |  |  |  |
| MEP | 447 | -0.08 (-0.25, 0.1) | 250 | **-0.22 (-0.44, 0)** | 197 | 0.17 (-0.12, 0.45) | **0.051** |
| MnBP | 419 | 0.15 (-0.03, 0.34) | 232 | -0.1 (-0.35, 0.15) | 187 | **0.39 (0.11, 0.66)** | **0.010** |
| MiBP | 434 | 0.12 (-0.11, 0.36) | 242 | **-0.31 (-0.6, -0.02)** | 192 | **0.74 (0.37, 1.1)** | **0.000** |
| MBzP | 442 | 0.17 (-0.01, 0.35) | 249 | -0.02 (-0.26, 0.21) | 193 | **0.42 (0.14, 0.7)** | **0.015** |
| ΣDEHP | 447 | -0.02 (-0.27, 0.22) | 250 | -0.29 (-0.61, 0.03) | 197 | 0.33 (-0.04, 0.71) | **0.016** |
| Waist circumference |  |  |  |  |  |  |  |
| MEP | 446 | -0.66 (-1.78, 0.45)* | 249 | **-1.66 (-3.11, -0.21)** | 197 | 0.91 (-0.83, 2.65) | **0.040** |
| MnBP | 418 | 0.41 (-0.74, 1.56) | 231 | -1.08 (-2.65, 0.49) | 187 | **1.85 (0.18, 3.52)** | **0.011** |
| MiBP | 433 | 0.12 (-1.37, 1.61) | 241 | **-2.04 (-4, -0.09)** | 192 | **3.17 (0.92, 5.42)** | **0.000** |
| MBzP | 441 | 1.04 (-0.11, 2.19) | 248 | -0.2 (-1.75, 1.34) | 193 | **2.6 (0.91, 4.3)** | **0.013** |
| ΣDEHP | 446 | -0.45 (-2.02, 1.11) | 249 | **-2.6 (-4.72, -0.48)** | 197 | 2.14 (-0.14, 4.43) | **0.003** |
| Sum of skinfolds |  |  |  |  |  |  |  |
| MEP | 432 | -1.33 (-6.47, 3.8) | 241 | -4.68 (-12.69, 3.33) | 191 | **5.75 (1.41, 10.08)** | **0.086** |
| MnBP | 404 | 4.53 (-1.22, 10.29) | 223 | 3.36 (-6.29, 13.02) | 181 | **5.04 (0.77, 9.3)** | 0.727 |
| MiBP | 420 | 5.82 (-1.23, 12.86) | 234 | 3.3 (-7.71, 14.31) | 186 | **10.6 (4.96, 16.24)** | 0.227 |
| MBzP | 427 | **7.43 (1.95, 12.9)** | 240 | 6.77 (-1.99, 15.53) | 187 | **8.37 (4.03, 12.72)** | 0.727 |
| ΣDEHP | 432 | 3.8 (-3.91, 11.5) | 241 | 3.18 (-9.36, 15.71) | 191 | **7.55 (1.64, 13.46)** | 0.696 |
| Waist-to-height ratio |  |  |  |  |  |  |  |
| MEP | 446 | 0 (-0.01, 0)* | 249 | **-0.01 (-0.02, 0)** | 197 | 0.01 (0, 0.02) | **0.022** |
| MnBP | 418 | 0.01 (0, 0.01) | 231 | -0.01 (-0.02, 0) | 187 | **0.02 (0.01, 0.03)** | **0.001** |
| MiBP | 433 | 0.01 (0, 0.02) | 241 | -0.01 (-0.02, 0.01) | 192 | **0.04 (0.02, 0.05)** | **0.000** |
| MBzP | 441 | **0.01 (0, 0.02)** | 248 | 0 (-0.01, 0.01) | 193 | **0.03 (0.02, 0.04)** | **0.002** |
| ΣDEHP | 446 | 0.01 (-0.01, 0.02) | 249 | -0.01 (-0.03, 0.01) | 197 | **0.02 (0.01, 0.04)** | **0.006** |

ΣDEHP: molar sum of MEHP, MEHHP, MEOHP. Total and HDL Cholesterol were log transformed to normalize their distributions. We calculated percent change by exponentiating beta coefficients, subtracting by 1 and multiplying by 100. All models are adjusted for child sex, exact age at examination, and maternal characteristics (age at delivery, parity, education, pre-pregnancy BMI, and smoking in pregnancy). Statistically significant associations (P <0.05) are displayed in bold type.*Interaction of exposure variable with child age at examination is statistically significant (P < 0.05).
